# Supplementary material
Source: PubMed Central journal article supplement (PMC3265866)
Supplement: supp_M111.302356_jbc.M111.302356-1.pdf [file supp_M111.302356_jbc.M111.302356-1.pdf]

**Supplementary Table 1.** Microarray analysis of the inflammation related, PGC-1 $\alpha$  regulated genes in mouse hepatocytes. The data was filtered to contain only genes up- or downregulated at least 1.5 fold in the same direction by both PGC-1 $\alpha$ -Ad and fasting. To identify the genes involved in inflammatory processes the data was analyzed with the Ingenuity software and the genes falling into categories immunological disease and inflammatory disease were selected. Several of the filtered genes are considered having primarily metabolic functions although associated with inflammation in certain context.

| #  | Gene Name | PGC1a-Ad/<br>GFP-Ad | GFP-Ad/<br>Not<br>Infected | Fasted/<br>Fed | Unigene<br>Symbol                 | Description                                             |
|----|-----------|---------------------|----------------------------|----------------|-----------------------------------|---------------------------------------------------------|
| 1  | Aco2      | 3,67                | 1,07                       | 1,68           | Mm_154581                         | aconitase 2, mitochondrial                              |
| 2  | Txnip     | 3,50                | -1,17                      | 8,88           | Mm_410189                         | thioredoxin interacting protein                         |
| 3  | Brap      | 3,19                | 1,01                       | 2,67           | Mm_153372                         | BRCA1 associated protein                                |
| 4  | Cd36      | 3,04                | -1,03                      | 4,11           | Mm_18628                          | CD36 antigen                                            |
| 5  | Il15ra    | 2,57                | 1,05                       | 1,64           | Mm_200196                         | interleukin 15 receptor, alpha chain                    |
| 6  | Mgrn1     | 2,46                | -1,23                      | 1,53           | Mm_291326<br>Mm_391848            | mahogunin, ring finger 1                                |
| 7  | Mertk     | 2,44                | 1,23                       | 1,64           | Mm_239655                         | c-mer proto-oncogene tyrosine kinase                    |
| 8  | Kiaa0564  | 2,32                | -1,55                      | 3,02           | Mm_159651                         | RIKEN cDNA 1300010F03 gene                              |
| 9  | Tmem135   | 2,07                | -1,16                      | 1,56           | Mm_208477                         | transmembrane protein 135                               |
| 10 | Il1rn     | 2,01                | 1,15                       | 2,04           | Mm_882                            | interleukin 1 receptor antagonist                       |
| 11 | Cyp17a1   | 1,95                | 1,00                       | 24,65          | Mm_1262                           | cytochrome P450, family 17, subfamily a, polypeptide 1  |
| 12 | Acad10    | 1,86                | -1,85                      | 2,04           | Mm_45423                          | acyl-Coenzyme A dehydrogenase family, member 10         |
| 13 | Cpt1a     | 1,86                | -1,07                      | 3,35           | Mm_18522                          | carnitine palmitoyltransferase 1a, liver                |
| 14 | D1ErtD53e | 1,82                | 1,13                       | 1,94           | Mm_382288                         | DNA segment, Chr 1, ERATO Doi 53, expressed             |
| 15 | Tmem86a   | 1,78                | -1,57                      | 1,86           | Mm_27338                          | transmembrane protein 86A                               |
| 16 | Lipe      | 1,78                | -1,32                      | 1,97           | Mm_333679                         | lipase, hormone sensitive                               |
| 17 | Lgals4    | 1,76                | -1,29                      | 8,36           | Mm_210336                         | lectin, galactose binding, soluble 4                    |
| 18 | Slc17a1   | 1,75                | -1,34                      | 1,65           | Mm_2656                           | solute carrier family 17 (sodium phosphate), member 1   |
| 19 | Slc25a13  | 1,69                | 1,13                       | 1,62           | Mm_24513                          | solute carrier family 25 member 13                      |
| 20 | Esrrg     | 1,67                | 1,12                       | 1,52           | Mm_89989<br>Mm_388156             | estrogen-related receptor gamma                         |
| 21 | Frap1     | 1,66                | 1,02                       | 2,46           | Mm_21158                          | FK506 binding protein 12-rapamycin associated protein 1 |
| 22 | Atg16l1   | 1,56                | -1,22                      | 1,58           | Mm_272972                         | autophagy-related 16-like 1 (yeast)                     |
| 23 | Rxrg      | 1,52                | -1,16                      | 1,53           | Mm_3475                           | retinoid X receptor gamma                               |
| 24 | Acot12    | 1,52                | -1,10                      | 2,78           | Mm_275963                         | acyl-CoA thioesterase 12                                |
| 25 | Lgals1    | -1,50               | 1,01                       | -2,82          | Mm_43831                          | lectin, galactose binding, soluble 1                    |
| 26 | GmDs      | -1,52               | 1,03                       | -1,54          | Mm_247143                         | GDP-mannose 4, 6-dehydratase                            |
| 27 | Narg1l    | -1,53               | 1,52                       | -1,60          | Mm_24425                          | NMDA receptor regulated 1-like                          |
| 28 | Pkhd1     | -1,56               | -1,80                      | -2,19          | Mm_249253                         | polycystic kidney and hepatic disease 1                 |
| 29 | Ube2l6    | -1,56               | -1,07                      | -1,64          | Mm_38261                          | ubiquitin-conjugating enzyme E2L 6                      |
| 30 | Crem      | -1,56               | -1,03                      | -1,99          | Mm_5244                           | cAMP responsive element modulator                       |
| 31 | Aacs      | -1,63               | 1,18                       | -4,89          | Mm_439974                         | acetoacetyl-CoA synthetase                              |
| 32 | Tubb5     | -1,65               | 1,22                       | -2,10          | Mm_273538<br>Mm_472638            | tubulin, beta 5                                         |
| 33 | Cxcl1     | -1,66               | -1,17                      | -6,08          | Mm_21013                          | chemokine (C-X-C motif) ligand 1                        |
| 34 | Tnfsf12*  | -1,67               | -3,69                      | -1,57          | Mm_8983                           | tumor necrosis factor (ligand) superfamily, member 12   |
| 35 | Alcam     | -1,69               | -1,01                      | -1,90          | Mm_288282                         | activated leukocyte cell adhesion molecule              |
| 36 | Slc25a37  | -1,71               | 1,16                       | -2,55          | Mm_293635                         | solute carrier family 25, member 37                     |
| 37 | Thbd      | -1,71               | -1,03                      | -1,62          | Mm_24096                          | thrombomodulin                                          |
| 38 | Egfr      | -1,78               | -1,29                      | -8,94          | Mm_8534<br>Mm_420648<br>Mm_439882 | epidermal growth factor receptor                        |
| 39 | Hspa1a    | -1,80               | 5,54                       | -3,12          | Mm_6388                           | heat shock protein 1A                                   |

|    |          |       |       |       |                        |                                                             |
|----|----------|-------|-------|-------|------------------------|-------------------------------------------------------------|
| 40 | Nup155   | -1,82 | 1,43  | -2,20 | Mm_295168              | nucleoporin 155                                             |
| 41 | Pfkfb3   | -1,96 | 1,82  | -3,92 | Mm_19669               | 6-phosphofructo-2-kinase/fructose-2,6-biphosphate 3         |
| 42 | Psmb9    | -2,01 | 1,39  | -2,28 | Mm_390983              | proteasomesubunit, beta type 9                              |
| 43 | Cadps2   | -2,08 | 1,20  | -2,56 | Mm_259632<br>Mm_379572 | Ca2+-dependent activator protein for secretion 2            |
| 44 | Fasn     | -2,16 | 1,19  | -4,22 | Mm_236443              | fatty acid synthase                                         |
| 45 | Rfc5     | -2,23 | 1,53  | -1,95 | Mm_27997               | replication factor C (activator 1) 5                        |
| 46 | Ccl9     | -2,27 | -1,22 | -1,58 | Mm_416125              | chemokine (C-C motif) ligand 9                              |
| 47 | Hnmt     | -2,44 | 1,24  | -1,72 | Mm_33120               | histamine N-methyltransferase                               |
| 48 | Slc10a2  | -2,45 | 2,82  | -1,76 | Mm_3500                | solute carrier family 10, member 2                          |
| 49 | Rcn1     | -2,58 | -1,14 | -1,54 | Mm_4876                | reticulocalbin 1                                            |
| 50 | Serpine2 | -2,62 | 1,03  | -2,21 | Mm_3093                | serine (or cysteine) peptidase inhibitor, clade E, member 2 |
| 51 | Pold2    | -2,78 | 2,02  | -3,95 | Mm_35788               | polymerase (DNA directed), delta 2, regulatory subunit      |
| 52 | Tk1      | -3,29 | 2,43  | -2,53 | Mm_2661                | thymidine kinase 1                                          |
| 53 | Cd24a    | -3,38 | 1,37  | -3,30 | Mm_29742               | CD24a antigen                                               |
| 54 | Dck      | -3,57 | 2,46  | -2,33 | Mm_298892              | deoxycytidine kinase                                        |
| 55 | Tpst1    | -3,77 | 1,62  | -2,09 | Mm_332720              | protein-tyrosine sulfotransferase 1                         |
| 56 | Cnpy4    | -3,77 | 1,72  | -1,58 | Mm_24592               | canopy 4 homolog (zebrafish)                                |
| 57 | Steap4   | -4,49 | 1,66  | -3,47 | Mm_31403               | STEAP family member 4                                       |
| 58 | Msh6     | -5,21 | 2,05  | -1,52 | Mm_18210               | mutS homolog 6 (E, coli)                                    |

\* name Tweak is used in this publication
