# Supplementary material
Source: PubMed Central journal article supplement (PMC3265866)
Supplement: supp_M111.302356_jbc.M111.302356-2.pdf [file supp_M111.302356_jbc.M111.302356-2.pdf]

PGC-1 $\alpha$ -Ad/GFP-Ad

2345  
genes  
 $\pm 1,5$  fold change

Ingenuity  
pathway  
analysis

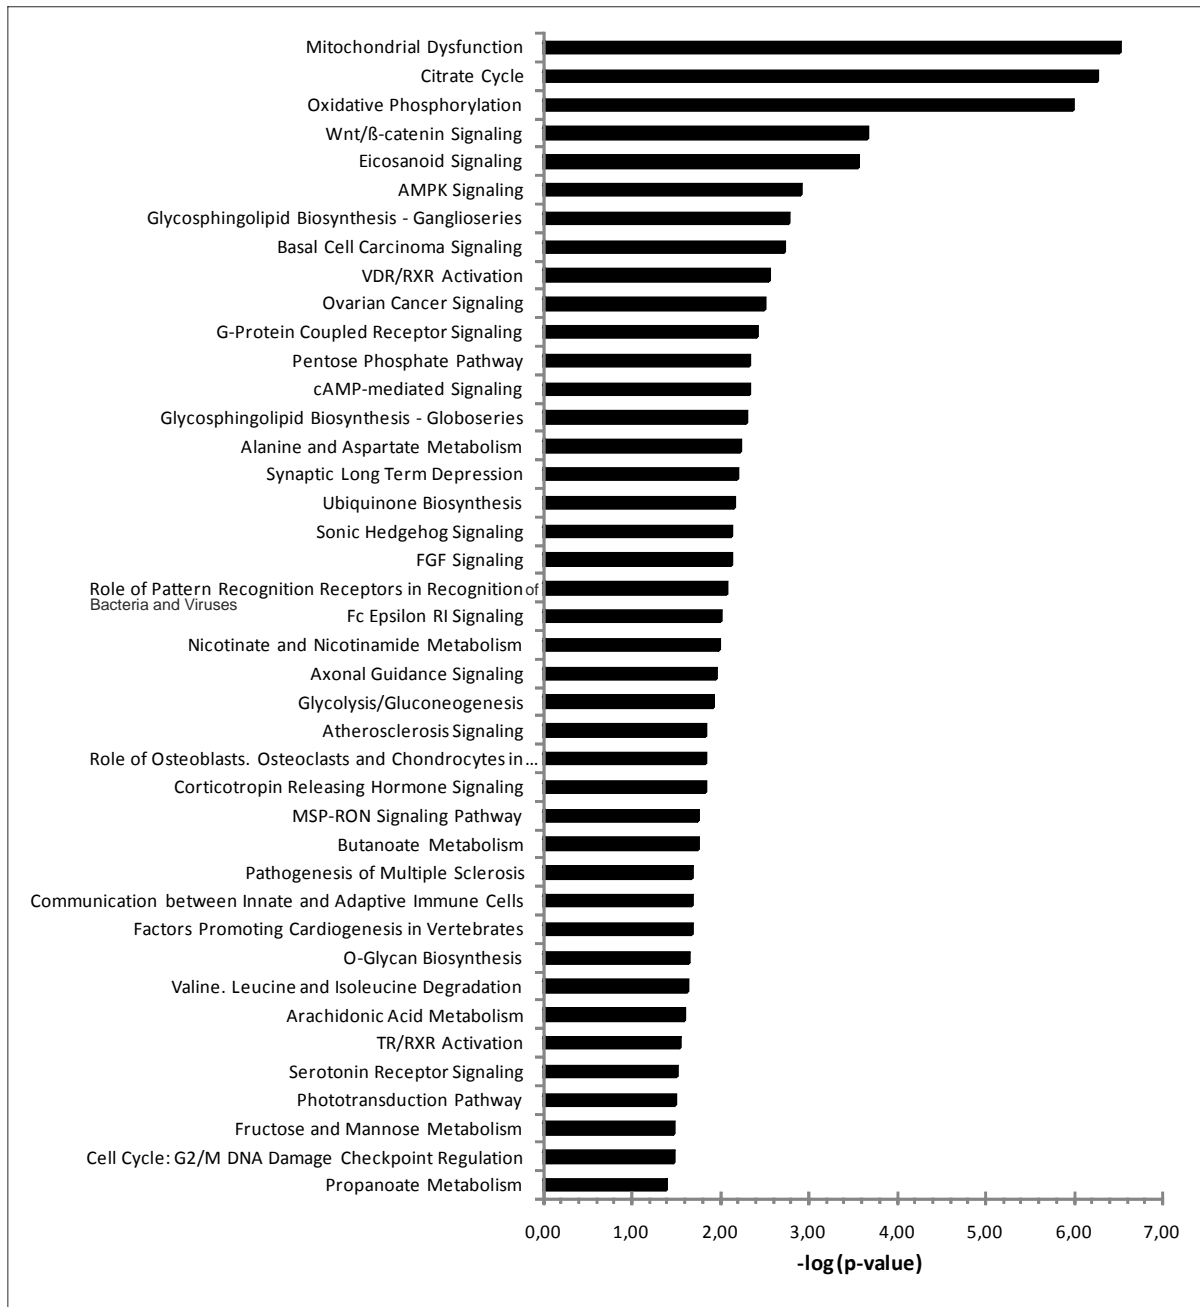

**Suppl. Fig.1.** Biological pathways affected in mouse hepatocytes after transduction with PGC-1 $\alpha$ -Ad. Inflammation related pathways, such as eicosanoids signaling, communication between innate and adaptive immune cells are differentially expressed in PGC-1 $\alpha$ -Ad transduced cells compared to GFP-Ad transduced cells. Pathways were identified with the Canonical Pathway feature of Ingenuity Pathway Analysis. Only significantly regulated pathways are shown. The  $-\log(P\text{-value})$  shown on the x-axis was calculated by Fisher's exact test. All shown pathways are characterized by  $-\log(P\text{-value}) = 1.3$ , which corresponds to P value of 0.05.
